# Supplementary material for: Basal Levels of CD18 Antigen Presenting Cells in Cow Milk Associate with Copy Number Variation of Fc Gamma Receptors
Source: MDPI journal article supplement (doi:10.3390/genes11080952), 2020-08-18
Supplement: s1 [file s1]

**Table S1** Nucleotide sequences (32 bp probes) used for Megablast search (fasta format).

```
>CD32_Probe1_V1_FCGR2A
TTTAGGGCCGGCAGCAATGACGGTGGGTCCTA
>CD32_Probe2_V2_FCGR2B_bison
TTTAGGGCCGGCAGCAATGACAGTGGGTCCTA
>CD32_Probe3_V3
TTTAGGGCCGGCAGCAACGACGGTGGGTCCTA
>CD32_Probe4_V4_FCGR2B
TTTAGGGCCGGCAGCAACGACAGTGGGTCCTA
>CD32_Probe5_V5
TTTAGGGCCAGCAGCAATGACGGTGGGTCCTA
>CD32_Probe6_V6
TTTAGGGCCAGCAGCAATGACAGTGGGTCCTA
>CD32_Probe7_V7_FCGR2C
TTTAGGGCCAGCAGCAACGACAGTGGGTCCTA
>CD32_Probe8_V8
TTTAGGGCCAGCAGCAACGACGGTGGGTCCTA
>CD18_Probe9
CAGCTGTCCCCACAGGAAGTGACGCTCTACCT
>HOXB7_Probe10_ex1_BTA19
ATGAGTTCATTGTATTATGCGAATGCTTTATT
>HOXA7_Probe11_ex1_BTA4
ATGAGTTCTTCGTATTATGTGAACGCGCTTTT
>SRY_Probe12_ex1_BTY
ATGTTTCAGAGTATTGAACGACGATGTTTACAG
>CD32_V4B_FCGR2B
AGGCAACCTCACCACGTGGTTCCATAACGGGA
```

**Table S2** Comparison of number of RNA-probe hits and expression levels between FCGR2s (CD32) and CD18, in Holstein milk.

| SRA        | Sample                | Total read count | Probe hits |   |   |     |   |   |     |   |     | Hit sum    | CD32 RPKM | CD18 RPKM |
|------------|-----------------------|------------------|------------|---|---|-----|---|---|-----|---|-----|------------|-----------|-----------|
|            |                       |                  | 1          | 2 | 3 | 4   | 5 | 6 | 7   | 8 | 9   |            |           |           |
| SRX2235349 | Y10ST0132-W2-Milk-RNA | 30,480,908       | 10         | 0 | 0 | 88  | 0 | 0 | 0   | 0 | 541 | <b>639</b> | 100.5     | 554.7     |
| SRX2235243 | 213012869-W2-Milk-RNA | 28,918,832       | 8          | 0 | 0 | 22  | 0 | 0 | 12  | 0 | 443 | <b>485</b> | 45.4      | 478.7     |
| SRX2235316 | 214016531-W2-Milk-RNA | 30,449,572       | 0          | 0 | 0 | 24  | 0 | 0 | 15  | 0 | 410 | <b>449</b> | 40.0      | 420.8     |
| SRX2235365 | 213012837-W2-Milk-RNA | 18,179,706       | 0          | 0 | 0 | 7   | 0 | 0 | 3   | 0 | 439 | <b>449</b> | 17.2      | 754.6     |
| SRX2235321 | 214016548-W2-Milk-RNA | 45,013,510       | 15         | 0 | 0 | 32  | 0 | 0 | 32  | 0 | 362 | <b>441</b> | 54.8      | 251.3     |
| SRX2235318 | 214016543-W2-Milk-RNA | 41,897,140       | 0          | 0 | 0 | 177 | 0 | 0 | 103 | 0 | 68  | <b>348</b> | 208.8     | 50.7      |
| SRX2235345 | Y10ST0052-W2-Milk-RNA | 26,493,242       | 2          | 0 | 0 | 40  | 0 | 0 | 0   | 0 | 299 | <b>341</b> | 49.5      | 352.7     |
| SRX2235188 | 213012829-W2-Milk-RNA | 40,398,796       | 3          | 0 | 0 | 42  | 0 | 0 | 8   | 0 | 277 | <b>330</b> | 41.0      | 214.3     |
| SRX2235232 | 213012868-W2-Milk-RNA | 17,678,968       | 0          | 0 | 0 | 0   | 0 | 0 | 3   | 0 | 306 | <b>309</b> | 5.3       | 540.9     |
| SRX2235361 | 211012549-W2-Milk-RNA | 23,695,512       | 0          | 0 | 1 | 22  | 0 | 0 | 9   | 0 | 247 | <b>279</b> | 42.2      | 325.7     |
| SRX2235210 | 213012834-W2-Milk-RNA | 14,517,104       | 2          | 0 | 0 | 6   | 0 | 0 | 9   | 0 | 235 | <b>252</b> | 36.6      | 505.9     |
| SRX2235341 | Y09ST0117-W2-Milk-RNA | 25,687,198       | 4          | 0 | 0 | 42  | 0 | 0 | 0   | 0 | 203 | <b>249</b> | 56.0      | 247.0     |
| SRX2235340 | Y09ST0099-W2-Milk-RNA | 21,342,290       | 10         | 0 | 0 | 54  | 0 | 0 | 0   | 0 | 173 | <b>237</b> | 93.7      | 253.3     |
| SRX2235368 | 213012901-W2-Milk-RNA | 20,876,820       | 0          | 0 | 0 | 19  | 0 | 0 | 7   | 0 | 209 | <b>235</b> | 38.9      | 312.8     |
| SRX2235367 | 213012871-W2-Milk-RNA | 16,301,126       | 3          | 0 | 0 | 2   | 0 | 0 | 10  | 0 | 220 | <b>235</b> | 28.8      | 421.8     |
| SRX2235254 | 208000985-W2-Milk-RNA | 18,609,806       | 0          | 0 | 0 | 13  | 0 | 0 | 0   | 0 | 219 | <b>232</b> | 21.8      | 367.7     |
| SRX2235376 | 214016522-W2-Milk-RNA | 19,981,694       | 5          | 0 | 0 | 7   | 0 | 1 | 7   | 0 | 205 | <b>225</b> | 31.3      | 320.6     |
| SRX2235394 | Y09ST0100-W2-Milk-RNA | 27,331,010       | 1          | 0 | 0 | 17  | 0 | 0 | 6   | 0 | 176 | <b>200</b> | 27.4      | 201.2     |
| SRX2235392 | Y09ST0076-W2-Milk-RNA | 16,939,670       | 0          | 0 | 0 | 0   | 0 | 0 | 9   | 0 | 184 | <b>193</b> | 16.6      | 339.4     |
| SRX2235362 | 213012796-W2-Milk-RNA | 15,556,506       | 1          | 0 | 0 | 23  | 0 | 0 | 0   | 0 | 163 | <b>187</b> | 48.2      | 327.4     |
| SRX2235353 | 210004788-W2-Milk-RNA | 34,156,568       | 5          | 0 | 0 | 55  | 0 | 0 | 1   | 0 | 125 | <b>186</b> | 55.8      | 114.4     |
| SRX2235386 | 210004820-W2-Milk-RNA | 25,894,168       | 10         | 0 | 2 | 66  | 0 | 0 | 2   | 0 | 96  | <b>176</b> | 96.5      | 115.9     |
| SRX2235348 | Y10ST0086-W2-Milk-RNA | 13,871,560       | 0          | 0 | 0 | 32  | 0 | 0 | 0   | 0 | 133 | <b>165</b> | 72.1      | 299.6     |
| SRX2235364 | 210004794-W2-Milk-RNA | 22,742,542       | 0          | 0 | 0 | 24  | 0 | 0 | 0   | 0 | 138 | <b>162</b> | 33.0      | 189.6     |
| SRX2235381 | 214016570-W2-Milk-RNA | 22,677,018       | 2          | 0 | 0 | 111 | 0 | 0 | 0   | 0 | 47  | <b>160</b> | 155.7     | 64.8      |
| SRX2235339 | Y09ST0054-W2-Milk-RNA | 23,314,056       | 0          | 0 | 0 | 7   | 0 | 0 | 12  | 0 | 133 | <b>152</b> | 25.5      | 178.3     |
| SRX2235199 | 213012832-W2-Milk-RNA | 16,135,480       | 0          | 0 | 0 | 11  | 0 | 0 | 2   | 0 | 139 | <b>152</b> | 25.2      | 269.2     |
| SRX2235342 | 209021321-W2-Milk-RNA | 12,847,312       | 1          | 0 | 0 | 31  | 0 | 0 | 1   | 0 | 107 | <b>140</b> | 80.3      | 260.3     |
| SRX2235221 | 213012838-W2-Milk-RNA | 11,794,498       | 2          | 0 | 0 | 3   | 0 | 0 | 1   | 0 | 134 | <b>140</b> | 15.9      | 355.0     |
| SRX2235177 | 213012826-W2-Milk-RNA | 24,880,104       | 1          | 0 | 0 | 19  | 0 | 0 | 10  | 0 | 106 | <b>136</b> | 37.7      | 133.1     |
| SRX2235355 | 210004816-W2-Milk-RNA | 10,383,028       | 2          | 0 | 1 | 22  | 0 | 0 | 0   | 0 | 109 | <b>134</b> | 75.2      | 328.1     |
| SRX2235317 | 214016533-W2-Milk-RNA | 27,837,496       | 0          | 0 | 0 | 4   | 0 | 0 | 16  | 0 | 113 | <b>133</b> | 22.5      | 126.9     |
| SRX2235373 | 214016499-W2-Milk-RNA | 28,657,822       | 0          | 0 | 0 | 53  | 0 | 0 | 3   | 0 | 74  | <b>130</b> | 61.1      | 80.7      |
| SRX2235354 | 210004803-W2-Milk-RNA | 16,343,722       | 3          | 0 | 0 | 14  | 0 | 0 | 11  | 0 | 101 | <b>129</b> | 53.5      | 193.1     |
| SRX2235319 | 214016546-W2-Milk-RNA | 24,965,984       | 1          | 0 | 0 | 33  | 0 | 0 | 26  | 0 | 66  | <b>126</b> | 75.1      | 82.6      |
| SRX2235301 | Y06BO0004-W2-Milk-RNA | 6,705,334        | 2          | 0 | 0 | 15  | 0 | 0 | 0   | 0 | 107 | <b>124</b> | 79.2      | 498.7     |
| SRX2235378 | 214016540-W2-Milk-RNA | 20,432,112       | 1          | 0 | 0 | 13  | 0 | 0 | 0   | 0 | 99  | <b>113</b> | 21.4      | 151.4     |
| SRX2235331 | 209021318-W2-Milk-RNA | 10,553,652       | 0          | 0 | 0 | 6   | 0 | 0 | 0   | 0 | 104 | <b>110</b> | 17.8      | 308.0     |
| SRX2235306 | Y10ST0126-W2-Milk-RNA | 7,716,406        | 0          | 0 | 0 | 1   | 0 | 0 | 4   | 0 | 105 | <b>110</b> | 20.2      | 425.2     |
| SRX2235305 | Y10ST0079-W2-Milk-RNA | 8,508,420        | 2          | 0 | 0 | 10  | 0 | 0 | 3   | 0 | 90  | <b>105</b> | 55.1      | 330.6     |
| SRX2235344 | Y10ST0047-W2-Milk-RNA | 16,705,320       | 0          | 0 | 0 | 12  | 0 | 0 | 0   | 0 | 91  | <b>103</b> | 22.4      | 170.2     |
| SRX2235288 | 214016509-W2-Milk-RNA | 16,609,864       | 0          | 0 | 0 | 6   | 0 | 0 | 1   | 0 | 96  | <b>103</b> | 13.2      | 180.6     |
| SRX2235299 | 214016523-W2-Milk-RNA | 24,236,758       | 4          | 0 | 0 | 87  | 0 | 0 | 0   | 0 | 10  | <b>101</b> | 117.3     | 12.9      |
| SRX2235277 | 214016494-W2-Milk-RNA | 12,940,436       | 0          | 0 | 0 | 8   | 0 | 0 | 9   | 0 | 84  | <b>101</b> | 41.1      | 202.9     |
| SRX2235358 | 210005486-W2-Milk-RNA | 7,163,216        | 0          | 0 | 0 | 3   | 0 | 0 | 3   | 0 | 93  | <b>99</b>  | 26.2      | 405.7     |
| SRX2235363 | 213012818-W2-Milk-RNA | 12,392,676       | 0          | 0 | 0 | 9   | 0 | 0 | 2   | 0 | 87  | <b>98</b>  | 27.7      | 219.4     |
| SRX2235396 | Y09ST0153-W2-Milk-RNA | 13,279,474       | 0          | 0 | 0 | 40  | 0 | 0 | 0   | 0 | 57  | <b>97</b>  | 94.1      | 134.1     |
| SRX2235371 | 214016492-W2-Milk-RNA | 13,705,344       | 2          | 0 | 0 | 32  | 0 | 0 | 0   | 0 | 60  | <b>94</b>  | 77.5      | 136.8     |
| SRX2235315 | Y10ST0106-W2-Milk-RNA | 12,607,454       | 0          | 0 | 0 | 4   | 0 | 0 | 2   | 0 | 82  | <b>88</b>  | 14.9      | 203.3     |
| SRX2235369 | 213012919-W2-Milk-RNA | 31,039,956       | 0          | 0 | 0 | 23  | 0 | 0 | 26  | 0 | 37  | <b>86</b>  | 49.3      | 37.3      |
| SRX2235304 | Y09ST0083-W2-Milk-RNA | 7,800,166        | 4          | 0 | 0 | 2   | 0 | 0 | 0   | 0 | 76  | <b>82</b>  | 24.0      | 304.5     |
| SRX2235289 | 208000940-W2-Milk-RNA | 9,973,050        | 0          | 0 | 0 | 0   | 0 | 0 | 0   | 0 | 82  | <b>82</b>  | 0.0       | 256.9     |
| SRX2235395 | Y09ST0128-W2-Milk-RNA | 16,016,804       | 0          | 0 | 0 | 11  | 0 | 0 | 18  | 0 | 52  | <b>81</b>  | 56.6      | 101.5     |
| SRX2235295 | 214016489-W2-Milk-RNA | 9,471,438        | 2          | 0 | 0 | 19  | 0 | 0 | 0   | 0 | 60  | <b>81</b>  | 69.3      | 198.0     |
| SRX2235393 | Y09ST0078-W2-Milk-RNA | 9,676,464        | 0          | 0 | 0 | 11  | 0 | 0 | 0   | 0 | 65  | <b>76</b>  | 35.5      | 209.9     |
| SRX2235377 | 214016527-W2-Milk-RNA | 23,508,288       | 0          | 0 | 0 | 63  | 0 | 0 | 0   | 0 | 11  | <b>74</b>  | 83.7      | 14.6      |
| SRX2235310 | 214016526-W2-Milk-RNA | 23,607,534       | 0          | 0 | 0 | 34  | 0 | 0 | 13  | 0 | 25  | <b>72</b>  | 62.2      | 33.1      |
| SRX2235338 | Y09ST0026-W2-Milk-RNA | 26,595,194       | 1          | 0 | 0 | 24  | 0 | 0 | 2   | 0 | 39  | <b>66</b>  | 31.7      | 45.8      |
| SRX2235293 | 213012898-W2-Milk-RNA | 4,584,264        | 0          | 0 | 0 | 11  | 0 | 0 | 2   | 0 | 49  | <b>62</b>  | 88.6      | 334.0     |
| SRX2235266 | 213012914-W2-Milk-RNA | 12,837,108       | 0          | 0 | 0 | 9   | 0 | 0 | 9   | 0 | 43  | <b>61</b>  | 43.8      | 104.7     |
| SRX2235390 | Y04BO0166-W2-Milk-RNA | 13,976,318       | 4          | 0 | 0 | 6   | 0 | 0 | 4   | 0 | 47  | <b>61</b>  | 31.3      | 105.1     |
| SRX2235379 | 214016550-W2-Milk-RNA | 24,224,716       | 0          | 0 | 0 | 13  | 0 | 0 | 27  | 1 | 18  | <b>59</b>  | 52.9      | 23.2      |
| SRX2235294 | 213012904-W2-Milk-RNA | 9,372,862        | 0          | 0 | 0 | 8   | 0 | 0 | 6   | 0 | 45  | <b>59</b>  | 46.7      | 150.0     |
| SRX2235291 | 211012561-W2-Milk-RNA | 4,487,086        | 0          | 0 | 0 | 11  | 0 | 0 | 3   | 0 | 45  | <b>59</b>  | 97.5      | 313.4     |
| SRX2235255 | 213012893-W2-Milk-RNA | 11,382,064       | 2          | 0 | 2 | 17  | 0 | 0 | 0   | 0 | 37  | <b>58</b>  | 57.7      | 101.6     |
| SRX2235346 | Y10ST0081-W2-Milk-RNA | 8,742,160        | 0          | 0 | 0 | 22  | 0 | 0 | 9   | 0 | 26  | <b>57</b>  | 110.8     | 92.9      |
| SRX2235290 | 208000943-W2-Milk-RNA | 7,165,874        | 0          | 0 | 0 | 3   | 0 | 0 | 0   | 0 | 54  | <b>57</b>  | 13.1      | 235.5     |
| SRX2235292 | 213012889-W2-Milk-RNA | 5,177,104        | 0          | 0 | 0 | 3   | 0 | 0 | 0   | 0 | 51  | <b>54</b>  | 18.1      | 307.8     |
| SRX2235356 | 210004823-W2-Milk-RNA | 11,763,706       | 3          | 0 | 0 | 18  | 0 | 0 | 0   | 0 | 32  | <b>53</b>  | 55.8      | 85.0      |
| SRX2235372 | 214016496-W2-Milk-RNA | 25,479,902       | 0          | 0 | 0 | 24  | 0 | 0 | 25  | 0 | 1   | <b>50</b>  | 60.1      | 1.2       |
| SRX2235374 | 214016508-W2-Milk-RNA | 17,872,296       | 1          | 0 | 0 | 11  | 0 | 0 | 9   | 0 | 28  | <b>49</b>  | 36.7      | 49.0      |
| SRX2235296 | 214016563-W2-Milk-RNA | 9,263,740        | 0          | 0 | 0 | 2   | 0 | 0 | 6   | 0 | 40  | <b>48</b>  | 27.0      | 134.9     |
| SRX2235322 | 214016569-W2-Milk-RNA | 22,603,920       | 0          | 0 | 0 | 30  | 0 | 0 | 0   | 0 | 15  | <b>45</b>  | 41.5      | 20.7      |
| SRX2235380 | 214016555-W2-Milk-RNA | 12,594,296       | 0          | 0 | 0 | 8   | 0 | 0 | 5   | 0 | 32  | <b>45</b>  | 32.3      | 79.4      |
| SRX2235360 | 210005511-W2-Milk-RNA | 24,511,974       | 5          | 0 | 0 | 28  | 0 | 0 | 0   | 0 | 11  | <b>44</b>  | 42.1      | 14.0      |
| SRX2235350 | Y10ST0136-W2-Milk-RNA | 10,947,772       | 0          | 0 | 0 | 6   | 0 | 0 | 0   | 0 | 37  | <b>43</b>  | 17.1      | 105.6     |
| SRX2235285 | Y10ST0036-W2-Milk-RNA | 4,577,696        | 1          | 0 | 0 | 10  | 0 | 0 | 0   | 0 | 30  | <b>41</b>  | 75.1      | 204.8     |
| SRX2235366 | 213012845-W2-Milk-RNA | 10,152,012       | 0          | 0 | 0 | 22  | 0 | 0 | 0   | 0 | 17  | <b>39</b>  | 67.7      | 52.3      |
| SRX2235347 | Y10ST0082-W2-Milk-RNA | 17,935,162       | 0          | 0 | 0 | 30  | 0 | 0 | 1   | 0 | 5   | <b>36</b>  | 54.0      | 8.7       |
| SRX2235279 | 213012766-W2-Milk-RNA | 2,394,778        | 0          | 0 | 0 | 9   | 0 | 0 | 0   | 0 | 26  | <b>35</b>  | 117.4     | 339.3     |
| SRX2235357 | 210004824-W2-Milk-RNA | 8,029,858        | 0          | 0 | 0 | 4   | 0 | 0 | 10  | 0 | 20  | <b>34</b>  | 54.5      | 77.8      |
| SRX2235280 | 213012816-W2-Milk-RNA | 3,969,810        | 0          | 0 | 0 | 3   | 0 | 0 | 0   | 0 | 29  | <b>32</b>  | 23.6      | 228.3     |
| SRX2235391 | Y09ST0062-W2-Milk-RNA | 14,806,576       | 3          | 0 | 1 | 15  | 0 | 0 | 0   | 0 | 11  | <b>30</b>  | 40.1      | 23.2      |
| SRX2235283 | 214016518-W2-Milk-RNA | 3,076,422        | 0          | 0 | 0 | 2   | 0 | 0 | 0   | 0 | 28  | <b>30</b>  | 20.3      | 284.4     |
| SRX2235352 | 210004789-W2-Milk-RNA | 10,517,488       | 0          | 0 | 0 | 11  | 0 | 0 | 0   | 0 | 15  | <b>26</b>  | 32.7      | 44.6      |
| SRX2235359 | 210005510-W2-Milk-RNA | 12,409,976       | 0          | 0 | 0 | 10  |   |   |     |   |     |            |           |           |

**Table S3** Comparison of number of genomic-probe hits and gene copies between FCGR2s (CD32) and control genes.

| SRA        | Total read count | Sex    | Breed      | Probe hits |   |   |    |   |   |    |   |    |    |    | Allele coverage | FCGR2A V1 | FCGR2B V4 | FCGR2C V7 | CD32 total | HOXB7 probe9 | HOXA7 probe10 | SRY probe11 | CD32 copy # |
|------------|------------------|--------|------------|------------|---|---|----|---|---|----|---|----|----|----|-----------------|-----------|-----------|-----------|------------|--------------|---------------|-------------|-------------|
|            |                  |        |            | 1          | 2 | 3 | 4  | 5 | 6 | 7  | 8 | 9  | 10 | 11 |                 |           |           |           |            |              |               |             |             |
| SRX5388796 | 470,474,464      | male   | Holstein   | 13         | 0 | 0 | 7  | 0 | 0 | 10 | 0 | 23 | 21 | 4  | 12              | 1.1       | 0.6       | 0.8       | 2.5        | 1.9          | 1.8           | 0.3         | 3.1         |
| SRX5388795 | 588,981,714      | male   | Holstein   | 33         | 0 | 0 | 8  | 0 | 0 | 12 | 0 | 35 | 33 | 11 | 15              | 2.2       | 0.5       | 0.8       | 3.6        | 2.4          | 2.2           | 0.7         | 3.4         |
| SRX5388794 | 489,874,890      | male   | Holstein   | 0          | 0 | 0 | 20 | 0 | 0 | 16 | 0 | 23 | 10 | 8  | 12              | 0.0       | 1.6       | 1.3       | 2.9        | 1.9          | 0.8           | 0.6         | 4.4         |
| SRX5388793 | 587,942,612      | male   | Holstein   | 9          | 0 | 0 | 25 | 0 | 0 | 14 | 0 | 23 | 18 | 9  | 15              | 0.6       | 1.7       | 0.9       | 3.2        | 1.6          | 1.2           | 0.6         | 4.8         |
| SRX5388792 | 567,993,322      | male   | Holstein   | 0          | 0 | 0 | 28 | 0 | 0 | 9  | 0 | 23 | 25 | 6  | 14              | 0.0       | 2.0       | 0.6       | 2.6        | 1.6          | 1.7           | 0.4         | 3.4         |
| SRX5388791 | 628,575,808      | male   | Holstein   | 21         | 0 | 0 | 25 | 0 | 0 | 0  | 0 | 19 | 24 | 11 | 16              | 1.3       | 1.6       | 0.0       | 2.9        | 1.2          | 1.5           | 0.7         | 4.3         |
| SRX5388790 | 424,180,494      | male   | Holstein   | 14         | 0 | 0 | 10 | 0 | 0 | 0  | 0 | 18 | 20 | 6  | 11              | 1.3       | 0.9       | 0.0       | 2.2        | 1.7          | 1.9           | 0.6         | 2.7         |
| SRX5388788 | 576,077,866      | male   | Holstein   | 16         | 0 | 0 | 17 | 0 | 0 | 9  | 0 | 24 | 17 | 5  | 14              | 1.1       | 1.2       | 0.6       | 2.9        | 1.7          | 1.2           | 0.3         | 4.6         |
| SRX5388783 | 555,070,320      | male   | Holstein   | 22         | 0 | 0 | 11 | 0 | 0 | 5  | 0 | 13 | 23 | 12 | 14              | 1.6       | 0.8       | 0.4       | 2.7        | 0.9          | 1.6           | 0.9         | 4.0         |
| SRX5388782 | 535,278,424      | male   | Holstein   | 9          | 0 | 0 | 17 | 0 | 0 | 0  | 0 | 26 | 17 | 6  | 13              | 0.7       | 1.3       | 0.0       | 1.9        | 1.9          | 1.3           | 0.4         | 2.7         |
| SRX5388772 | 331,842,454      | female | Holstein   | 3          | 0 | 0 | 4  | 0 | 0 | 3  | 0 | 4  | 5  | 3  | 8               | 0.4       | 0.5       | 0.4       | 1.2        | 0.5          | 0.6           | 0.4         | 4.2         |
| SRX5388760 | 333,947,112      | male   | Holstein   | 5          | 0 | 0 | 5  | 0 | 0 | 0  | 0 | 8  | 4  | 2  | 8               | 0.6       | 0.6       | 0.0       | 1.2        | 1.0          | 0.5           | 0.2         | 3.6         |
| SRX5388759 | 351,401,114      | female | Holstein   | 7          | 0 | 0 | 0  | 0 | 0 | 2  | 0 | 9  | 6  | 0  | 9               | 0.8       | 0.0       | 0.2       | 1.0        | 1.0          | 0.7           | 0.0         | 2.4         |
| SRX5388722 | 621,669,354      | male   | Holstein   | 22         | 0 | 0 | 9  | 0 | 0 | 23 | 0 | 21 | 35 | 3  | 16              | 1.4       | 0.6       | 1.5       | 3.5        | 1.3          | 2.2           | 0.2         | 4.6         |
| SRX5388721 | 466,874,314      | male   | Holstein   | 5          | 0 | 0 | 12 | 0 | 0 | 8  | 0 | 8  | 22 | 13 | 12              | 0.4       | 1.0       | 0.7       | 2.1        | 0.7          | 1.9           | 1.1         | 2.9         |
| SRX5388720 | 421,586,302      | male   | Holstein   | 0          | 0 | 0 | 13 | 0 | 0 | 14 | 0 | 8  | 15 | 6  | 11              | 0.0       | 1.2       | 1.3       | 2.5        | 0.8          | 1.4           | 0.6         | 4.7         |
| SRX5388719 | 564,266,702      | male   | Holstein   | 22         | 0 | 0 | 15 | 0 | 0 | 0  | 0 | 17 | 34 | 13 | 14              | 1.5       | 1.1       | 0.0       | 2.6        | 1.2          | 2.4           | 0.9         | 2.9         |
| SRX5388718 | 618,128,856      | male   | Holstein   | 30         | 0 | 0 | 11 | 0 | 0 | 11 | 0 | 27 | 18 | 10 | 16              | 1.9       | 0.7       | 0.7       | 3.3        | 1.7          | 1.2           | 0.6         | 4.7         |
| SRX5388717 | 580,249,376      | male   | Holstein   | 14         | 0 | 0 | 23 | 0 | 0 | 7  | 0 | 21 | 14 | 16 | 15              | 1.0       | 1.6       | 0.5       | 3.0        | 1.4          | 1.0           | 1.1         | 4.3         |
| SRX5388716 | 571,900,668      | male   | Holstein   | 0          | 0 | 0 | 25 | 0 | 0 | 20 | 0 | 16 | 14 | 7  | 14              | 0.0       | 1.7       | 1.4       | 3.1        | 1.1          | 1.0           | 0.5         | 6.1         |
| SRX5388798 | 333,869,172      | ND     | Angus      | 6          | 0 | 0 | 6  | 0 | 0 | 0  | 0 | 4  | 3  | 1  | 8               | 0.7       | 0.7       | 0.0       | 1.4        | 0.5          | 0.4           | 0.1         | 7.5         |
| SRX5388780 | 493,208,872      | male   | Angus      | 15         | 0 | 0 | 20 | 0 | 0 | 0  | 0 | 10 | 20 | 11 | 12              | 1.2       | 1.6       | 0.0       | 2.8        | 0.8          | 1.6           | 0.9         | 4.3         |
| SRX5388779 | 388,734,538      | male   | Angus      | 8          | 0 | 0 | 4  | 0 | 0 | 7  | 0 | 8  | 16 | 5  | 10              | 0.8       | 0.4       | 0.7       | 1.9        | 0.8          | 1.6           | 0.5         | 3.3         |
| SRX5388778 | 451,330,720      | male   | Angus      | 2          | 0 | 0 | 4  | 0 | 0 | 2  | 0 | 8  | 8  | 2  | 11              | 0.2       | 0.4       | 0.2       | 0.7        | 0.7          | 0.7           | 0.2         | 2.2         |
| SRX5388634 | 229,153,424      | male   | Hereford   | 0          | 0 | 0 | 11 | 0 | 0 | 0  | 0 | 2  | 4  | 1  | 6               | 0.0       | 1.9       | 0.0       | 1.9        | 0.3          | 0.7           | 0.2         | 7.9         |
| SRX5388768 | 134,268,496      | male   | Hereford   | 1          | 0 | 0 | 3  | 0 | 0 | 0  | 0 | 3  | 3  | 1  | 3               | 0.3       | 0.9       | 0.0       | 1.2        | 0.9          | 0.9           | 0.3         | 2.9         |
| SRX5388764 | 206,098,750      | male   | Hereford   | 4          | 0 | 0 | 4  | 0 | 0 | 0  | 0 | 1  | 4  | 1  | 5               | 0.8       | 0.8       | 0.0       | 1.5        | 0.2          | 0.8           | 0.2         | 6.7         |
| SRX5388417 | 507,699,238      | male   | Hereford   | 18         | 0 | 0 | 20 | 0 | 0 | 0  | 0 | 16 | 25 | 10 | 13              | 1.4       | 1.6       | 0.0       | 3.0        | 1.3          | 2.0           | 0.8         | 3.7         |
| SRX5388706 | 345,045,756      | male   | Charolaise | 2          | 0 | 0 | 4  | 0 | 0 | 4  | 0 | 5  | 11 | 5  | 9               | 0.2       | 0.5       | 0.5       | 1.2        | 0.6          | 1.3           | 0.6         | 2.4         |
| SRX5388705 | 371,643,412      | male   | Charolaise | 10         | 0 | 0 | 14 | 0 | 0 | 0  | 0 | 5  | 5  | 3  | 9               | 1.1       | 1.5       | 0.0       | 2.6        | 0.5          | 0.5           | 0.3         | 9.2         |
| SRX5388641 | 454,126,982      | male   | Charolaise | 4          | 0 | 0 | 10 | 0 | 0 | 0  | 0 | 10 | 5  | 2  | 11              | 0.3       | 0.9       | 0.0       | 1.2        | 0.9          | 0.4           | 0.2         | 4.1         |
| SRX5388510 | 427,558,928      | male   | Charolaise | 0          | 0 | 0 | 16 | 0 | 0 | 0  | 0 | 9  | 10 | 6  | 11              | 0.0       | 1.5       | 0.0       | 1.5        | 0.8          | 0.9           | 0.6         | 3.2         |
| SRX5388642 | 402,309,450      | male   | Limousine  | 3          | 0 | 0 | 6  | 0 | 0 | 0  | 0 | 5  | 3  | 4  | 10              | 0.3       | 0.6       | 0.0       | 0.9        | 0.5          | 0.3           | 0.4         | 3.8         |
| SRX5388640 | 434,740,428      | male   | Limousine  | 0          | 0 | 0 | 18 | 0 | 0 | 0  | 0 | 8  | 8  | 3  | 11              | 0.0       | 1.6       | 0.0       | 1.6        | 0.7          | 0.7           | 0.3         | 4.7         |
| SRX5388639 | 366,943,370      | male   | Limousine  | 1          | 0 | 0 | 6  | 0 | 0 | 0  | 0 | 10 | 4  | 2  | 9               | 0.1       | 0.6       | 0.0       | 0.8        | 1.1          | 0.4           | 0.2         | 2.2         |
| SRX5388637 | 418,123,230      | male   | Limousine  | 0          | 0 | 0 | 9  | 0 | 0 | 0  | 0 | 9  | 10 | 1  | 11              | 0.0       | 0.9       | 0.0       | 0.9        | 0.9          | 1.0           | 0.1         | 2.3         |
| SRX7427485 | 571,200,404      | male   | Simmental  | 15         | 0 | 0 | 6  | 0 | 0 | 9  | 0 | 27 | 17 | 10 | 14              | 1.0       | 0.4       | 0.6       | 2.1        | 1.9          | 1.2           | 0.7         | 2.8         |
| SRX7427463 | 607,416,724      | male   | Simmental  | 5          | 0 | 0 | 16 | 0 | 0 | 7  | 0 | 21 | 21 | 17 | 15              | 0.3       | 1.0       | 0.5       | 1.8        | 1.4          | 1.4           | 1.1         | 2.4         |
| SRX7427462 | 587,475,052      | female | Simmental  | 11         | 0 | 0 | 14 | 0 | 0 | 5  | 0 | 23 | 27 | 0  | 15              | 0.7       | 0.9       | 0.3       | 2.0        | 1.6          | 1.8           | 0.0         | 2.4         |
| SRX5388697 | 493,971,372      | male   | Simmental  | 0          | 0 | 0 | 10 | 0 | 0 | 0  | 0 | 14 | 6  | 2  | 12              | 0.0       | 0.8       | 0.0       | 0.8        | 1.1          | 0.5           | 0.2         | 2.3         |
